# Supplementary figures and images for: Tacrolimus/methotrexate vs tacrolimus/reduced-dose methotrexate/mycophenolate for graft-versus-host disease prevention
Source: PubMed Central journal article supplement — Blood Adv. 2023 Jun 26;7(16):4505–13. doi: 10.1182/bloodadvances.2023010310 (PMC10440463; doi:10.1182/bloodadvances.2023010310), 2023-06-26

## Supplementary Figure 1: CONSORT Diagram

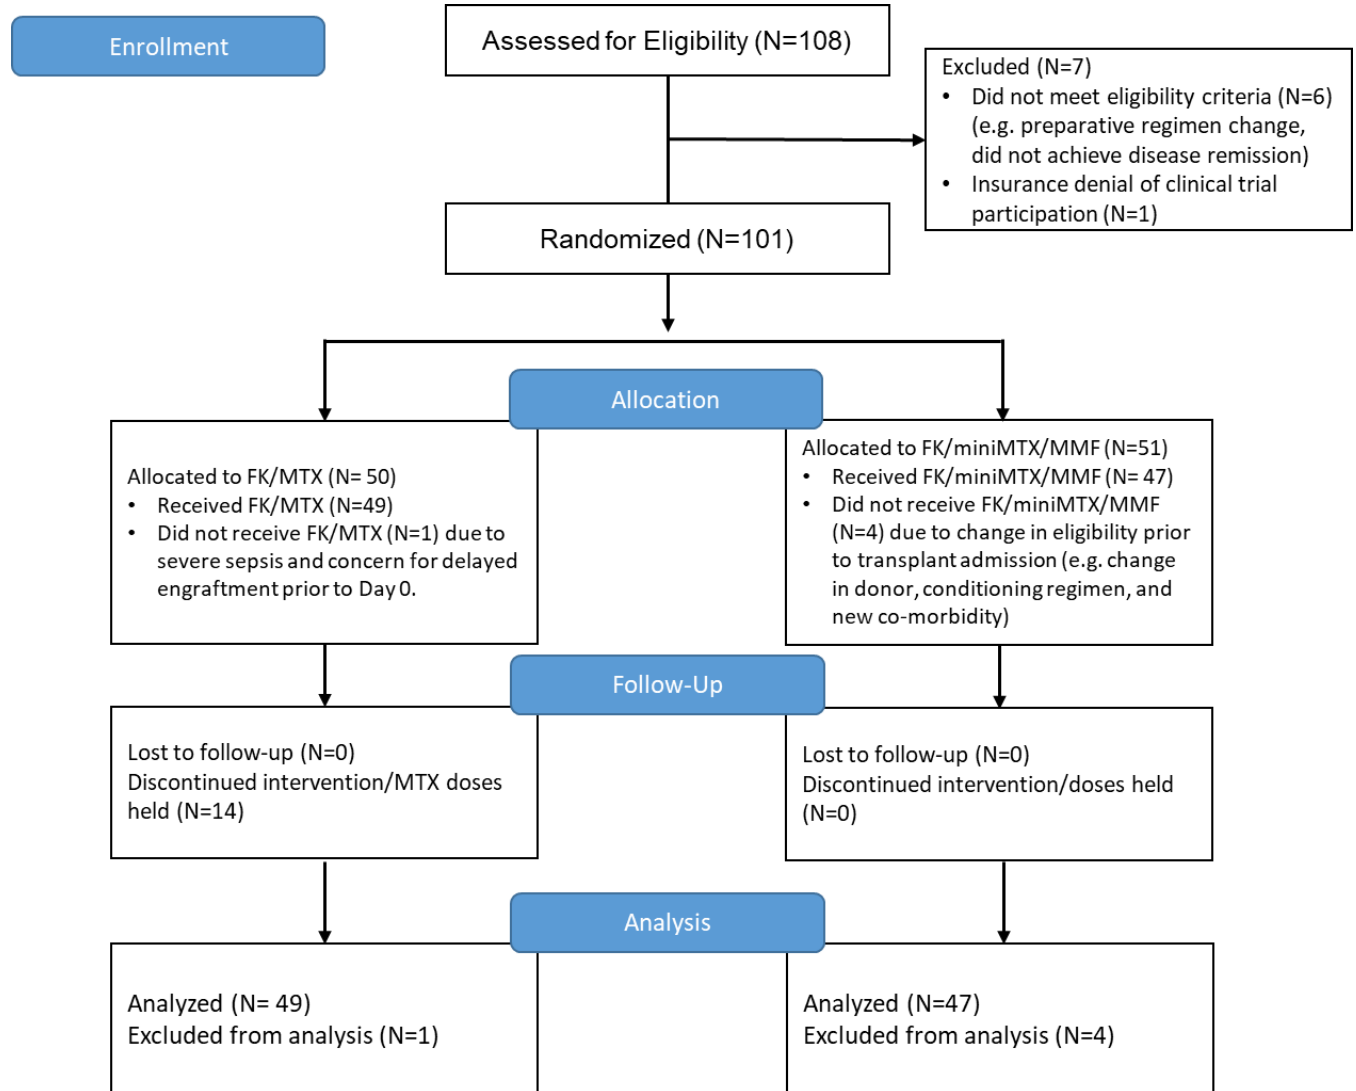

Supplement: BLOODA_ADV-2023-010310-mmc1.pdf [file BLOODA_ADV-2023-010310-mmc1.pdf]
